# Supplementary material for: The β-phosphorus hyperfine coupling constant in nitroxides: 6. Solvent effects in non-cyclic nitroxides
Source: Royal Society of Chemistry journal article supplement (doi:10.1039/c6ob00359a), 2016-01-01
Supplement: c6ob00359a1.pdf [file c6ob00359a1.pdf]

$\beta$ -Phosphorus Hyperfine Coupling Constant in Nitroxides: 6. Solvent Effect in Non-Cyclic Nitroxides

*Gérard Audran,<sup>a\*</sup> Raphael Bikanga,<sup>b</sup> Lionel Bosco,<sup>a</sup> Paul Brémond,<sup>a\*</sup> Teddy Butscher,<sup>a</sup> and Sylvain R. A. Marque,<sup>a,c\*</sup> and Paulin Nkolo<sup>a</sup>*

<sup>a</sup> Aix-Marseille Université, CNRS-UMR 7273, ICR, case 541, Avenue Escadrille Normandie-Niemen, 13397 Marseille Cedex 20 France.

<sup>b</sup> Université des Sciences et Technique de Masuku, Laboratoire de Substances Naturelles et des Synthèses Organométalliques, B.P. 493 Franceville, Gabon

<sup>c</sup> N. N. Vorozhtsov Novosibirsk Institute of Organic Chemistry SB RAS, Pr. Lavrentjeva 9, 630090 Novosibirsk, Russia.

**Table 1S1.** HBD parameter  $\alpha$ , intrinsic volume  $V_X$ , molar volume  $V_M$ , normalized Reichardt solvent polarity parameter  $E_T^N$ , cohesive pressure  $c$ , polarity/polarizability  $\pi^*$ , relative dielectric constant  $\epsilon_r$  and dipolar moment  $\mu^{1-2}$

|    | Solvent <sup>a</sup>                           | $E_T^N$ <sup>b</sup> | $c$ <sup>b</sup> | $\pi^{*b,d}$ | $\alpha^{b,d}$ | $V_X$ <sup>d</sup> | $V_M$ <sup>c</sup> | $\epsilon_r^{b,c}$ | $\mu^{b,c}$ | $n$                 | $\delta$ | $B$ |
|----|------------------------------------------------|----------------------|------------------|--------------|----------------|--------------------|--------------------|--------------------|-------------|---------------------|----------|-----|
| 1  | <i>n</i> -pentane                              | 0.009                | 205              | -0.15        | 0.00           | 81.3               | 114.52             | 1.84               | 0.00        | 1.3575              | 0        | 0   |
| 2  | <i>n</i> -hexane                               | 0.009                | 225              | -0.11        | 0.00           | 95.4               | 130.50             | 1.88               | 0.09        | 1.3749              | 0        | 0   |
| 3  | CHex                                           | 0.006                | 285              | 0.00         | 0.00           | 84.5               | 108.10             | 2.02               | 0.00        | 1.4262              | 0        | 0°  |
| 4  | <i>n</i> -octane                               | 0.012                | 231              | 0.01         | 0.00           | 123.6              | 162.56             | 1.95               | 0.00        | 1.3876 <sup>e</sup> | 0        | 0   |
| 5  | benzene                                        | 0.111                | 353              | 0.55         | 0.00           | 71.6               | 88.85              | 2.27               | 0.00        | 1.5011              | 1        | 48  |
| 6  | toluene                                        | 0.099                | 337              | 0.49         | 0.00           | 85.7               | 106.24             | 2.38               | 0.31        | 1.4969              | 1        | 58  |
| 7  | <i>t</i> -BuPh                                 | 0.099                | 337              | 0.41         | 0.00           | 113.9              | 154.80             | 2.37               | 0.36        | 1.4927              | 1        | 60  |
| 8  | PhBr                                           | 0.182                | 408              | 0.77         | 0.00           | 89.1               | 105.03             | 2.65               | 1.56        | 1.5568              | 1        | 40  |
| 9  | Pyridine                                       | 0.302                | 466              | 0.87         | 0.00           | 67.5               | 80.55              | 12.91              | 2.37        | 1.5102              | 1        | 472 |
| 10 | AcPh                                           | 0.306                | 456              | 0.68         | 0.00           | 101.4              | 116.30             | 17.39              | 2.95        | 1.5342              | 1        | 202 |
| 11 | <i>t</i> -BuPh/CH <sub>2</sub> Cl <sub>2</sub> |                      |                  |              |                |                    |                    |                    |             |                     | 1        |     |
| 12 | CH <sub>2</sub> Cl <sub>2</sub>                | 0.309                | 414              | 0.73         | 0.13           | 49.4               | 64.00              | 8.93               | 1.14        | 1.4242              | 0.5      | 23  |
| 13 | DCE                                            | 0.327                | 400              | 0.73         | 0.00           | 63.5               | 80.16              | 10.36              | 1.83        | 1.4448              | 0.5      | 40  |
| 14 | CHCl <sub>3</sub>                              | 0.259                | 362              | 0.69         | 0.20           | 61.7               | 80.50              | 4.89               | 1.15        | 1.4459              | 0.5      | 14  |
| 15 | CCl <sub>4</sub>                               | 0.052                | 310              | 0.21         | 0.00           | 73.9               | 96.49              | 2.24               | 0.00        | 1.4602              | 0.5      | 0   |
| 16 | DME                                            | 0.231                | 307              | 0.53         | 0.00           | 55.2               | 104.4              | 3.5                | 1.71        | 1.3796              | 0        | 238 |
| 17 | Et <sub>2</sub> O                              | 0.117                | 251              | 0.24         | 0.00           | 73.1               | 103.80             | 4.20               | 1.15        | 1.3524              | 0        | 271 |

|    |                             |       |       |      |      |       |        |        |      |        |   |     |
|----|-----------------------------|-------|-------|------|------|-------|--------|--------|------|--------|---|-----|
| 18 | <i>i</i> -Pr <sub>2</sub> O | 0.105 | 243.5 | 0.19 | 0.00 | 101.3 | 141.14 | 3.88   | 1.22 | 1.3689 | 0 | 293 |
| 19 | <i>n</i> -Bu <sub>2</sub> O | 0.071 | 251   | 0.18 | 0.00 | 129.5 | 169.30 | 3.08   | 1.17 | 1.3992 | 0 | 33  |
| 20 | <i>t</i> -BuOMe             | 0.124 |       |      |      |       |        |        |      | 1.3690 | 0 |     |
| 21 | 14D                         | 0.164 | 388   | 0.49 | 0.00 | 68.1  | 85.22  | 2.21   | 0.45 | 1.424  | 0 | 236 |
| 22 | THF                         | 0.207 | 359   | 0.55 | 0.00 | 62.2  | 81.14  | 7.58   | 1.75 | 1.4072 | 0 | 305 |
| 23 | AcOEt                       | 0.228 | 331   | 0.45 | 0.00 | 74.7  | 97.86  | 6.02   | 1.78 | 1.3614 | 0 | 164 |
| 24 | acetone                     | 0.355 | 488   | 0.62 | 0.08 | 54.7  | 73.55  | 20.56  | 2.69 | 1.3587 | 0 | 193 |
| 25 | ACN                         | 0.46  | 581   | 0.66 | 0.19 | 40.4  | 52.43  | 35.94  | 3.92 | 1.3441 | 0 | 178 |
| 26 | MeNO <sub>2</sub>           | 0.481 | 669   | 0.75 | 0.22 | 42.4  | 53.64  | 35.87  | 3.56 | 1.3819 | 0 | 65  |
| 27 | DMSO                        | 0.444 | 708   | 1    | 0.00 | 61.3  | 71.40  | 46.45  | 4.06 | 1.4793 | 0 | 362 |
| 28 | F                           | 0.775 | 1568  | 0.97 | 0.71 | 36.5  | 39.54  | 109.50 | 3.37 | 1.4475 | 0 | 270 |
| 29 | NMF                         | 0.722 | 910   | 0.90 | 0.62 | 50.6  | 58.48  | 182.40 | 3.86 | 1.4319 | 0 | 287 |
| 30 | DMF                         | 0.386 | 581   | 0.88 | 0.00 | 58.1  | 77.40  | 36.71  | 3.82 | 1.4305 | 0 | 294 |
| 31 | MeOH                        | 0.762 | 858   | 0.60 | 0.98 | 30.8  | 40.43  | 32.66  | 2.87 | 1.3284 | 0 | 218 |
| 32 | EtOH                        | 0.654 | 676   | 0.54 | 0.86 | 44.9  | 58.41  | 24.55  | 1.66 | 1.3614 | 0 | 235 |
| 33 | TFE                         | 0.898 | 573   | 0.73 | 1.51 | 41.5  | 72.40  | 26.67  | 2.52 | 1.2907 | 0 |     |
| 34 | <i>i</i> -PrOH              | 0.546 | 558   | 0.48 | 0.76 | 59.0  | 76.51  | 19.92  | 1.66 | 1.4772 | 0 | 236 |
| 35 | <i>n</i> -BuOH              | 0.586 | 485   | 0.47 | 0.84 | 73.1  | 91.53  | 17.51  | 1.75 | 1.3993 | 0 | 231 |
| 36 | <i>t</i> -BuOH              | 0.389 | 467   | 0.41 | 0.42 | 73.1  | 93.95  | 12.47  | 1.66 | 1.3877 | 0 | 247 |
| 37 | BnOH                        | 0.608 | 612.9 | 0.98 | 0.60 | 91.6  | 103.67 | 12.70  | 1.66 | 1.5404 | 0 | 208 |
| 38 | EG                          | 0.79  | 1050  | 0.92 | 0.90 | 50.8  | 56.01  | 37.70  | 2.31 | 1.4318 | 0 | 224 |

|    |                              |       |       |      |      |       |        |       |      |        |     |     |
|----|------------------------------|-------|-------|------|------|-------|--------|-------|------|--------|-----|-----|
| 39 | TEG                          | 0.682 | 786.4 | 0.88 | 0.66 | 118.9 | 133.48 | 23.69 | 5.58 | 1.4558 | 0   | 260 |
| 40 | water/MeOH                   | 0.71  |       |      |      |       |        |       |      |        | 0   |     |
| 41 | water                        | 1     | 2294  | 1.09 | 1.17 | 16.7  | 18.00  | 78.36 | 1.85 | 1.3330 | 0   | 156 |
| 42 | Tampon                       | --    | --    |      |      |       |        |       |      |        | 0   |     |
| 43 | AcOH                         | 0.648 | 357   | 0.64 | 1.12 | 46.5  | 57.24  | 6.15  | 1.68 | 1.3719 | 0   | 139 |
| 44 | Et <sub>3</sub> N            | 0.043 | 231   | 0.09 | 0.00 | 105.4 | 138.81 | 2.42  | 0.66 | 1.4010 | 0   | 650 |
| 45 | <i>i</i> -Pr <sub>2</sub> NH | 0.145 | 314   |      |      |       |        |       | 1.15 | 1.3924 | 0   |     |
| 46 | <i>i</i> -PenOH              | 0.565 | 510.8 | 0.40 | 0.84 | 87.2  | 108.87 | 15.19 | 1.82 | 1.4085 | 0   | 227 |
| 47 | CS <sub>2</sub>              | 0.065 | 412   | 0.51 | 0.00 | 49.1  | 60.28  | 2.64  | 0.06 | 1.6275 | 0   | 0   |
| 48 | Mecyc                        | 0.006 | 255.4 |      | 0    |       | 127.67 | 2.02  | 0    | 1.4231 | 0   | 0   |
| 49 | PhCl                         | 0.108 | 383   | 0.68 | 0.00 | 83.9  | 101.68 | 5.62  | 1.69 | 1.5248 | 0.5 | 38  |

<sup>a</sup> CHex: cyclo-hexane, tBuPh: tert-butylbenzene, PhBr: bromobenzene, AcPh: acetophenone, DCE: 1,2-di-chloroethane, DME: 1,2-dimethoxyethane, 14D: 1,4-dioxane, THF: tetrahydrofuran, AcOEt: ethyl acetate, ACN: acetonitrile, DMSO: dimethylsulfoxide, F: formamide, NMF: N-methylformamide, DMF: N,N-dimethylformamide, TFE: 2,2,2-trifluoroethanol, EG: ethylene glycol, TEG: triethylene glycol, AcOH: acetic acid, *i*-PenOH: iso-pentanol, Mecyc: methylcyclopentane, PhCl: chlorobenzene. <sup>b</sup> Given in ref. 1. <sup>c</sup> Given in ref. 2. <sup>d</sup> Given in ref. 3. <sup>e</sup> For *n*-heptane.

**Table 2SI.** Koppel-Palm linear correlations of  $a_N$  for **1• - 7•**.

| eq. | nitroxide             | $y$ -intercept <sup>a</sup> | $a_2^{a,b}$            | $a_4^{a,b}$            | $a_5^{a,b}$             | $R^{2c}$ | $N^d$ | $F$ -test <sup>e</sup> | $w_{f(\alpha)}^f$ | $w_E^f$       | $w_C^f$       | outliers    |
|-----|-----------------------|-----------------------------|------------------------|------------------------|-------------------------|----------|-------|------------------------|-------------------|---------------|---------------|-------------|
| 9a  | <b>1•<sup>g</sup></b> | 14.82 (14)                  | <sup>-h</sup>          | 0.056 (2)              | <sup>-h</sup>           | 0.94     | 41    | 280                    | 11 <sup>i</sup>   | 89            | <sup>-j</sup> | 29,39       |
| 9b  | <b>2•<sup>k</sup></b> | 15.09 (44)                  | <sup>-h</sup>          | 0.058 (6)              | <sup>-h</sup>           | 0.93     | 15    | 82                     | 14 <sup>i</sup>   | 86            | <sup>-j</sup> | 2,15,26     |
| 9c  | <b>3•</b>             | 13.49 (2)                   | <sup>-h</sup>          | 0.015 (4) <sup>l</sup> | 0.0004 (1)              | 0.94     | 26    | 197                    | <sup>-j</sup>     | 38            | 62            | 14,33,38,39 |
| 9d  |                       | 13.34 (5)                   | 0.50 (16) <sup>m</sup> | <sup>-h</sup>          | 0.0006 (1)              | 0.94     | 26    | 180                    | 17                | <sup>-j</sup> | 83            | 14,33,38,39 |
| 9e  | <b>4•</b>             | 13.57 (4)                   | <sup>-h</sup>          | 0.039 (4)              | 0.0002 (1) <sup>n</sup> | 0.87     | 36    | 110                    | <sup>-j</sup>     | 79            | 21            | 14,31,38    |
| 9f  |                       | 13.38 (7)                   | 0.69 (22) <sup>o</sup> | <sup>-h</sup>          | 0.0006 (1)              | 0.87     | 37    | 113                    | 24                | <sup>-j</sup> | 76            | 14,33,43    |
| 9g  | <b>5•</b>             | 13.50 (3)                   | <sup>-h</sup>          | 0.026 (3)              | 0.0002 (1) <sup>p</sup> | 0.90     | 39    | 168                    | <sup>-j</sup>     | 72            | 28            | none        |
| 9h  |                       | 13.28 (5)                   | 0.72 (16)              | <sup>-h</sup>          | 0.0005 (1)              | 0.91     | 38    | 183                    | 29                | <sup>-j</sup> | 71            | 33,43       |
| 9i  | <b>6•</b>             | 13.44 (12)                  | <sup>-h</sup>          | 0.010 (3)              | 0.0004 (1)              | 0.89     | 37    | 140                    | <sup>-j</sup>     | 32            | 68            | 27,33       |
| 9j  | <b>7•</b>             | 13.41 (4)                   | <sup>-h</sup>          | 0.016 (3)              | 0.0004 (1)              | 0.90     | 39    | 159                    | <sup>-j</sup>     | 44            | 56            | none        |
| 9k  |                       | 13.27 (4)                   | 0.52 (13) <sup>q</sup> | <sup>-h</sup>          | 0.0005 (1)              | 0.92     | 38    | 207                    | 22                | <sup>-j</sup> | 78            | 33          |

<sup>a</sup> Errors are given on the last digit in parentheses. <sup>b</sup> Student  $t$ -test at 99.99% unless otherwise mentioned. <sup>c</sup> Square of the regression coefficient. <sup>d</sup> Number of data. <sup>e</sup> Student-Fischer  $F$ -test given at 99.99% unless otherwise mentioned. <sup>f</sup> Weight of each parameter in percent with an error of  $\pm 7\%$  as given by eqs. 17 and 18. <sup>g</sup> Polarizability was the only other parameter affording reliable statistical outputs, i.e.,  $a_1 = 1.61$  (50) and  $t =$

99.73%. <sup>h</sup> Not included in the correlation. <sup>i</sup> Given for  $f(n^2)$ . <sup>j</sup> Not determined. <sup>k</sup>  $a_1 = -2.39$  (1.59) and  $t$ -test at 84%. Other possibilities were even worse. <sup>l</sup>  $t$ -test = 99.89%. <sup>m</sup>  $t = 99.44\%$ . <sup>n</sup>  $t = 92.87\%$ . <sup>o</sup>  $t = 99.68\%$ . <sup>p</sup>  $t = 99.90\%$ . <sup>q</sup>  $t = 99.97\%$ .

**Table 3SI.** Koppel – Palm multiparameter correlations (eq. 10) based on the Kirkwood function of the relative permittivity  $\epsilon_r$ , the cohesive pressure (square of the Hildebrand solubility parameter  $\delta_H$ ), and on the molar volume  $V_M$  for nitroxides **5•** - **7•**.

| eq  |           | $\log a_{P,0}^a$ | $b_2^{a,b}$            | $b_5^{a,b}$              | $b_6^{a,b}$            | $R^{2c}$ | $F^d$ | $N^e$ | $w_{f(\epsilon_r)}^f$ | $w_\epsilon^f$ | $w_{V_M}^f$    | outliers |
|-----|-----------|------------------|------------------------|--------------------------|------------------------|----------|-------|-------|-----------------------|----------------|----------------|----------|
| 10a | <b>5•</b> | 49.8 (3)         | -4.3 (11) <sup>g</sup> | -0.0020 (4)              | - <sup>h</sup>         | 0.76     | 55    | 38    | - <sup>i</sup>        | - <sup>i</sup> | - <sup>i</sup> | 41,44    |
| 10b |           | 48.5 (6)         | -3.2 (11) <sup>j</sup> | -0.0016 (4) <sup>k</sup> | 0.009 (4) <sup>l</sup> | 0.80     | 45    | 38    | 31                    | 42             | 27             | 41,44    |
| 10c | <b>6•</b> | 46.2 (3)         | -2.2 (9) <sup>m</sup>  | -0.0017 (3)              | - <sup>h</sup>         | 0.71     | 45    | 39    | - <sup>i</sup>        | - <sup>i</sup> | - <sup>i</sup> | 41       |
| 10d |           | 45.4 (5)         | -1.6 (9) <sup>n</sup>  | -0.0015 (4)              | 0.005 (3) <sup>o</sup> | 0.74     | 33    | 39    | 24                    | 54             | 22             | 41       |
| 10e | <b>7•</b> | 45.6 (2)         | -2.2 (8) <sup>p</sup>  | -0.0022 (3)              | - <sup>h</sup>         | 0.79     | 66    | 39    | - <sup>i</sup>        | - <sup>i</sup> | - <sup>i</sup> | 41       |
| 10f |           | 44.7 (5)         | -1.5 (9) <sup>q</sup>  | -0.0020 (3)              | 0.006 (3) <sup>r</sup> | 0.81     | 49    | 39    | 18                    | 60             | 22             | 41       |

<sup>a</sup> Errors are given on the last digit in parentheses. <sup>b</sup> Student *t*-test of confidence given at 99.99 % unless otherwise mentioned. <sup>c</sup> Square of the regression coefficient. <sup>d</sup> Student-Fischer *F*-test of reliability given at 99.99% confidence. <sup>e</sup> Number of data. <sup>f</sup> Weight of each parameter in per cent with an error of  $\pm 7\%$  as given by eqs. 17 and 18. <sup>g</sup>  $t = 99.96\%$ . <sup>h</sup> Not included in the correlation. <sup>i</sup> Not determined. <sup>j</sup>  $t = 99.40\%$ . <sup>k</sup>  $t = 99.94\%$ . <sup>l</sup>  $t = 98.4\%$ . <sup>m</sup>  $t = 98.60\%$ . <sup>n</sup>  $t = 94.5\%$ . <sup>o</sup>  $t = 98.20\%$ . <sup>p</sup>  $t = 99.80\%$ . <sup>q</sup>  $t = 93.75\%$ . <sup>r</sup>  $t = 94.70\%$ .

**Table 4SI.** Kalmét – Aboud – Taft multiparameter correlations (eq. 14) for  $a_N$  of nitroxides **1•** - **7•** based on the polarity/polarizability parameter  $\pi^*$ , the cohesive pressure  $c$ , and on the Hydrogene Bonding Donor (HBD) parameter  $\alpha$  of solvents.

| eq. |           | $y$ -intercept <sup>a</sup> | $c_1^{a,b}$            | $c_3^{a,b}$            | $c_5^{a,b}$             | $R^{2c}$ | $F^d$ | $N^e$ | $w_{\pi^*f}$ | $w_{\alpha}^f$ | $w_c^f$    | outliers           |
|-----|-----------|-----------------------------|------------------------|------------------------|-------------------------|----------|-------|-------|--------------|----------------|------------|--------------------|
| 14a | <b>1•</b> | 15.20 (3)                   | 0.58 (5)               | 0.73 (4)               | - <i>g</i>              | 0.95     | 355   | 41    | - <i>h</i>   | - <i>h</i>     | - <i>h</i> | 29,39              |
| 14b |           | 15.18 (3)                   | 0.49 (6)               | 0.68 (4)               | 0.0002 (6) <sup>i</sup> | 0.96     | 281   | 41    | 30           | 58             | 12         | 29,39              |
| 14c | <b>2•</b> | 14.00 (14)                  | 1.05 (20) <sup>j</sup> | 1.13 (9)               | - <i>g</i>              | 0.96     | 103   | 12    | - <i>h</i>   | - <i>h</i>     | - <i>h</i> | 2,15,26            |
| 14d |           | 14.10 (19)                  | 0.77 (35) <sup>k</sup> | 1.01 (15) <sup>l</sup> | 0.0002 (2) <sup>m</sup> | 0.96     | 68    | 12    | 22           | 64             | 12         | 2,15,26            |
| 14e | <b>3•</b> | 13.49 (4)                   | 0.45 (7)               | 0.40 (4)               | - <i>g</i>              | 0.90     | 117   | 28    | - <i>h</i>   | - <i>h</i>     | - <i>h</i> | 38,39              |
| 14f |           | 13.48 (4)                   | 0.33 (8) <sup>l</sup>  | 0.44 (6)               | 0.0002 (1) <sup>n</sup> | 0.93     | 101   | 28    | 28           | 49             | 23         | 38,39              |
| 14g | <b>4•</b> | 13.49 (4)                   | 0.47 (6)               | 0.48 (5)               | - <i>g</i>              | 0.84     | 95    | 38    | - <i>h</i>   | - <i>h</i>     | - <i>h</i> | 33,41              |
| 14h |           | 13.56 (4)                   | 0.38 (9)               | 0.44 (6)               | 0.0002 (1) <sup>o</sup> | 0.87     | 77    | 40    | 31           | 49             | 20         | none               |
| 14i | <b>5•</b> | 13.50 (2)                   | 0.42 (4)               | 0.37 (3)               | - <i>g</i>              | 0.90     | 170   | 38    | - <i>h</i>   | - <i>h</i>     | - <i>h</i> | 28,41 <sup>p</sup> |
| 14j |           | 13.44 (3)                   | 0.33 (5)               | 0.33 (4)               | 0.0002 (1)              | 0.93     | 163   | 40    | 31           | 44             | 25         | none               |
| 14k | <b>6•</b> | 13.50 (3)                   | 0.27 (5)               | 0.30 (4)               | - <i>g</i>              | 0.80     | 70    | 39    | - <i>h</i>   | - <i>h</i>     | - <i>h</i> | 27,41              |
| 14l |           | 13.41 (3)                   | 0.13 (5) <sup>q</sup>  | 0.13 (4) <sup>r</sup>  | 0.0004 (1)              | 0.90     | 103   | 38    | 16           | 20             | 64         | 27,33              |



|     |    |           |          |          |                |      |     |    |                |                |                |      |
|-----|----|-----------|----------|----------|----------------|------|-----|----|----------------|----------------|----------------|------|
| 14m | 7• | 13.44 (3) | 0.39 (5) | 0.26 (5) | - <sup>s</sup> | 0.83 | 187 | 39 | - <sup>h</sup> | - <sup>h</sup> | - <sup>h</sup> | 41   |
| 14n |    | 13.38 (3) | 0.23 (5) | 0.18 (4) | 0.0003 (1)     | 0.92 | 137 | 40 | 27             | 29             | 44             | none |

<sup>a</sup> Errors are given on the last digit in parentheses. <sup>b</sup> Student *t*-test of confidence given at 99.99% unless otherwise mentioned. <sup>c</sup> Square of the regression coefficient. <sup>d</sup> Student-Fischer *F*-test of reliability given at 99.99% confidence. <sup>e</sup> Number of data. <sup>f</sup> Weight of each parameter in percent with an error of  $\pm 7\%$  as given by eqs. 17 and 18. <sup>g</sup> Not used in the correlation. <sup>h</sup> Not determined. <sup>i</sup>  $t = 99.10\%$ . <sup>j</sup>  $t = 99.94\%$ . <sup>k</sup>  $t = 94.10\%$ . <sup>l</sup>  $t = 99.98\%$ . <sup>m</sup>  $t = 64.00\%$ . <sup>n</sup>  $t = 99.00\%$ . <sup>o</sup>  $t = 98.29\%$ . <sup>p</sup> Same  $R^2$  and  $F$  values are observed when 28 and 41 are included except a larger scattering than for the 3-parameter correlation. <sup>q</sup>  $t = 96.80\%$ . <sup>r</sup>  $t = 99.60\%$ .

**Table 5SI.** Kalmét – Aboud – Taft multiparameter correlations (eq. 15) for  $a_{\beta,p}$  of nitroxides **1•** - **8•** based on the polarity/polarizability parameter  $\pi^*$ , the cohesive pressure  $c$ , the intrinsic volume  $V_X$ , and on the Hydrogen Bonding Donor (HBD) parameter  $\alpha$  of solvents.

| eq  |           | $y$ -intercept <sup>a</sup> | $d_1^{a,b}$ | $d_3^{a,b}$             | $t^c$          | $d_5^{a,b}$               | $R^{2d}$ | $F^e$ | $N^f$ | $w_{\pi^*g}$   | $w_\alpha^g$   | $w_c^g$        | outliers                      |
|-----|-----------|-----------------------------|-------------|-------------------------|----------------|---------------------------|----------|-------|-------|----------------|----------------|----------------|-------------------------------|
| 15a | <b>2•</b> | 40.52 (58)                  | -9.87 (93)  | -12.86 (63)             | 99.99          | - <sup>h</sup>            | 0.98     | 297   | 14    | 34             | 66             | - <sup>i</sup> | 41                            |
| 15b | <b>3•</b> | 46.29 (13)                  | -2.07 (30)  | 0.75 (22)               | 99.79          | - <sup>h</sup>            | 0.68     | 25    | 26    | - <sup>i</sup> | - <sup>i</sup> | - <sup>i</sup> | 27,30,36,41                   |
| 15c |           | 46.51 (13)                  | -1.34 (27)  | 1.19 (19)               | 99.99          | -0.0014 (13) <sup>y</sup> | 0.83     | 36    | 26    | 31             | 37             | 32             | 27,30,36,41                   |
| 15d | <b>4•</b> | 49.48 (8)                   | -1.45 (19)  | 0.0048 (1241)           | 3.00           | - <sup>h</sup>            | 0.77     | 38    | 26    | 99             | 1              | - <sup>i</sup> | 12-14,24-27,29,30,35,37-39,41 |
| 15e |           | 49.62 (7)                   | -0.99 (16)  | - <sup>h</sup>          | - <sup>h</sup> | -0.0008 (2) <sup>k</sup>  | 0.88     | 84    | 26    | 57             | - <sup>i</sup> | 43             | 12-14,24-27,29,30,35,37-39,41 |
| 15f |           | 49.65 (6)                   | -1.03 (15)  | 0.19 (9)                | 95.00          | -0.0009 (2)               | 0.90     | 65    | 26    | 48             | 13             | 39             | 12-14,24-27,29,30,35,37-39,41 |
| 15g | <b>5•</b> | 48.71 (8)                   | -1.65 (14)  | -1.16 (10)              | 99.99          | - <sup>h</sup>            | 0.94     | 230   | 32    | 28             | 72             | - <sup>i</sup> | 12-14,25,26,28,29,44          |
| 15h | <b>6•</b> | 44.54 (10)                  | -1.84 (17)  | 0.08 (13) <sup>l</sup>  | 49.0           | - <sup>h</sup>            | 0.78     | 63    | 38    | 94             | 6              | - <sup>i</sup> | 28,29                         |
| 15i |           | 45.86 (12)                  | -1.35 (25)  | - <sup>h</sup>          | - <sup>h</sup> | -0.0013                   | 0.81     | 79    | 39    | 54             | - <sup>i</sup> | 46             | 41                            |
| 15j | <b>7•</b> | 55.80 (10)                  | -1.92 (18)  | -0.25 (13) <sup>m</sup> | 94.0           | - <sup>h</sup>            | 0.82     | 82    | 38    | 85             | 15             | - <sup>i</sup> | 28,29                         |
| 15k |           | 45.27 (12)                  | -1.33 (24)  | - <sup>h</sup>          | - <sup>h</sup> | -0.0018 (3)               | 0.86     | 112   | 39    | 46             | - <sup>i</sup> | 54             | 41                            |

<sup>a</sup> Errors are given on the last digit in parenthesis. <sup>b</sup> Student  $t$ -test of confidence given at 99.99% unless otherwise mentioned. <sup>c</sup> Student  $t$ -test. <sup>d</sup>

Square of the regression coefficient. <sup>e</sup> Student-Fischer  $F$ -test of reliability given at 99.99% confidence. <sup>f</sup> Number of data. <sup>g</sup> Weight of each

parameter in percent with an error of  $\pm 7\%$  as given by eqs. 17 and 18. <sup>h</sup> Not used in the correlation. <sup>i</sup> Not determined. <sup>j</sup>  $t = 99.98\%$ . <sup>k</sup>  $t = 99.98\%$ .

<sup>l</sup>  $t = 49.00\%$ . <sup>m</sup>  $t = 94.00\%$ .

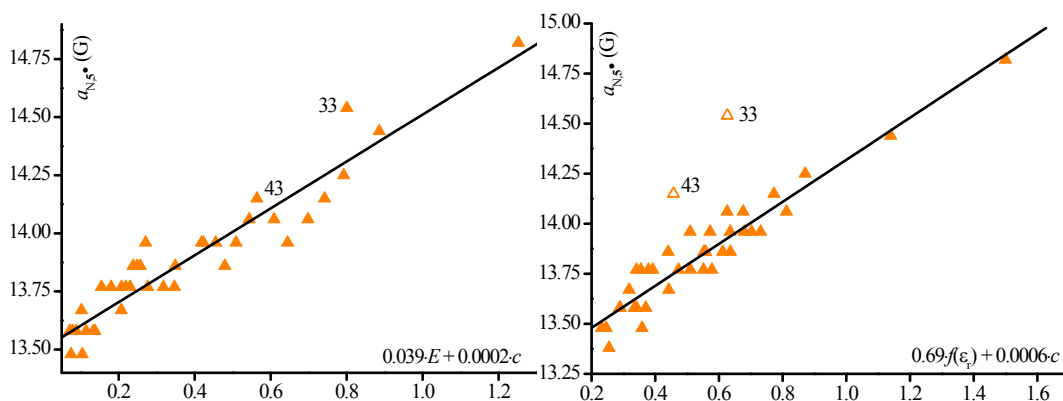

**Figure 1SI.** Koppel-Palm plots  $a_N = f(E,c)$  and  $a_N = f(f(\varepsilon_r),c)$  (left and right hand-sides, respectively) for **5•** (□). Empty symbols are for outliers.

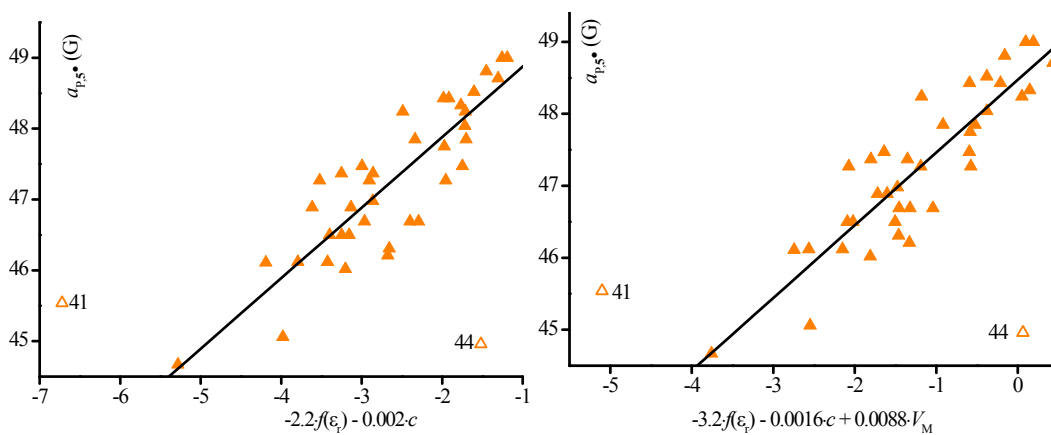

**Figure 2SI.** Koppel – Palm plots with two (left) and three (right) molecular descriptors for  $a_p = f(c,f(\varepsilon_r))$  and  $a_p = f(c,f(\varepsilon_r),V_M)$  for **5•** (□). Empty symbols are for outliers.

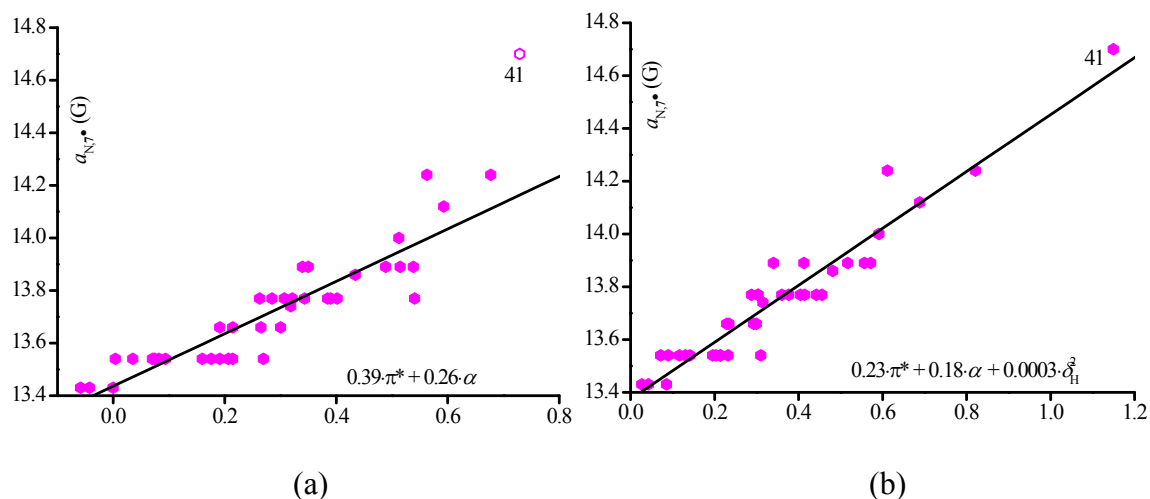

**Figure 3SI.** KAT plots of eqs. 14l (a) and 14m (b) for  $7\bullet$ .

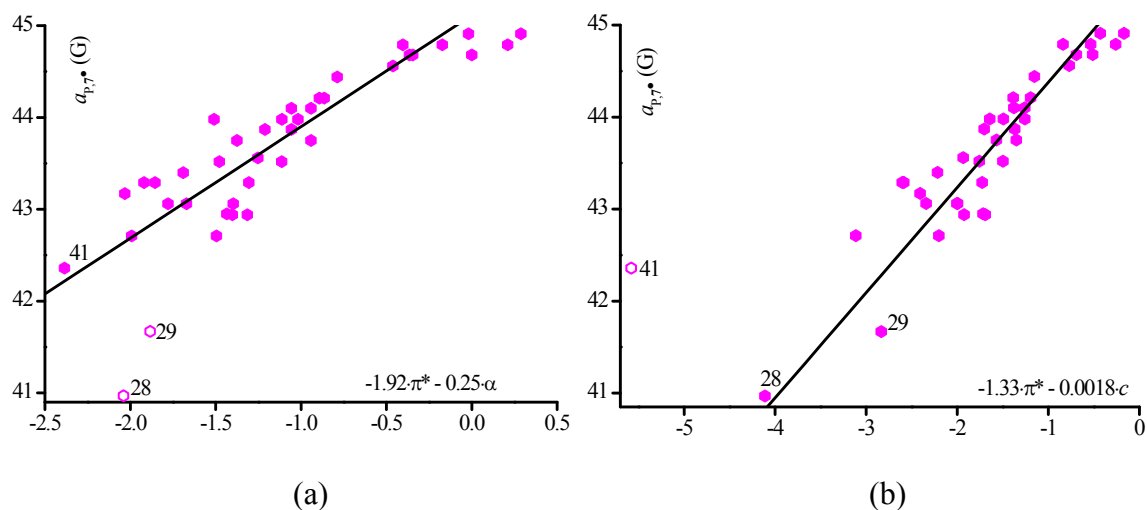

**Figure 4SI.** KAT correlations for  $7\bullet$  with (a) eq. 15j and (b) eq. 15k. Empty symbols are for outliers.

<sup>1</sup> C. Reichardt, T. Welton, *Solvent and Solvent Effect in Organic Chemistry*, 4<sup>th</sup> ed., Wiley-VCH, Weinheim, 2011.

<sup>2</sup> G. E. Zaikov, R. G. Makitra, G. G. Midyana, L. I. Bazylyak, *Influence of the Solvent on Some Radical Reaction Chemistry Research and Applications Series*, Nova Science Publishers Inc., New York, **2010**.
